# Supplementary material for: DNA evidence of bowhead whale exploitation by Greenlandic Paleo-Inuit 4,000 years ago
Source: PubMed Central journal article supplement (PMC5105157; doi:10.1038/ncomms13389), 2016-11-08
Supplement: ncomms13389-s1.pdf [file ncomms13389-s1.pdf]

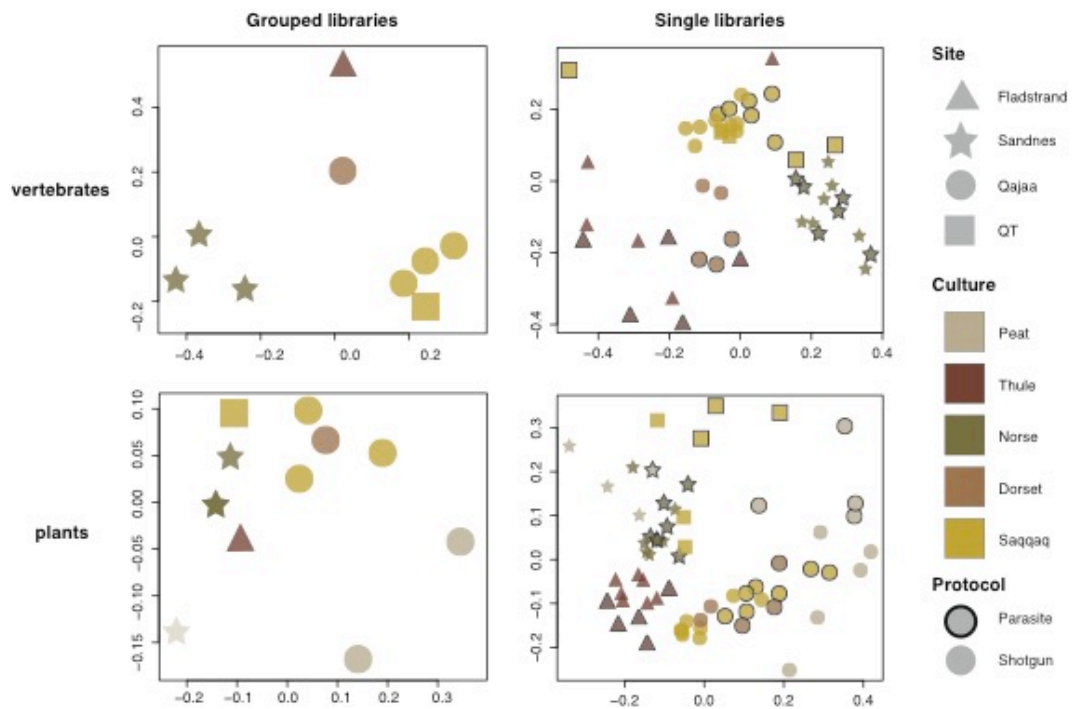

**Supplementary Figure 1 | Variation within grouped and single libraries based on DNA reads assigned to vertebrates and plants.** For vertebrate DNA, distance calculations are based on the 42 vertebrate taxa identified in Supplementary Table 2 and 3. Due to absence of vertebrate DNA, peat layers were not included. Distance calculations for plants were based on plant families represented by more than 50 reads across the entire data set. Grouped libraries represents several single libraries merged into groups according to the sections presented in Figure 1.

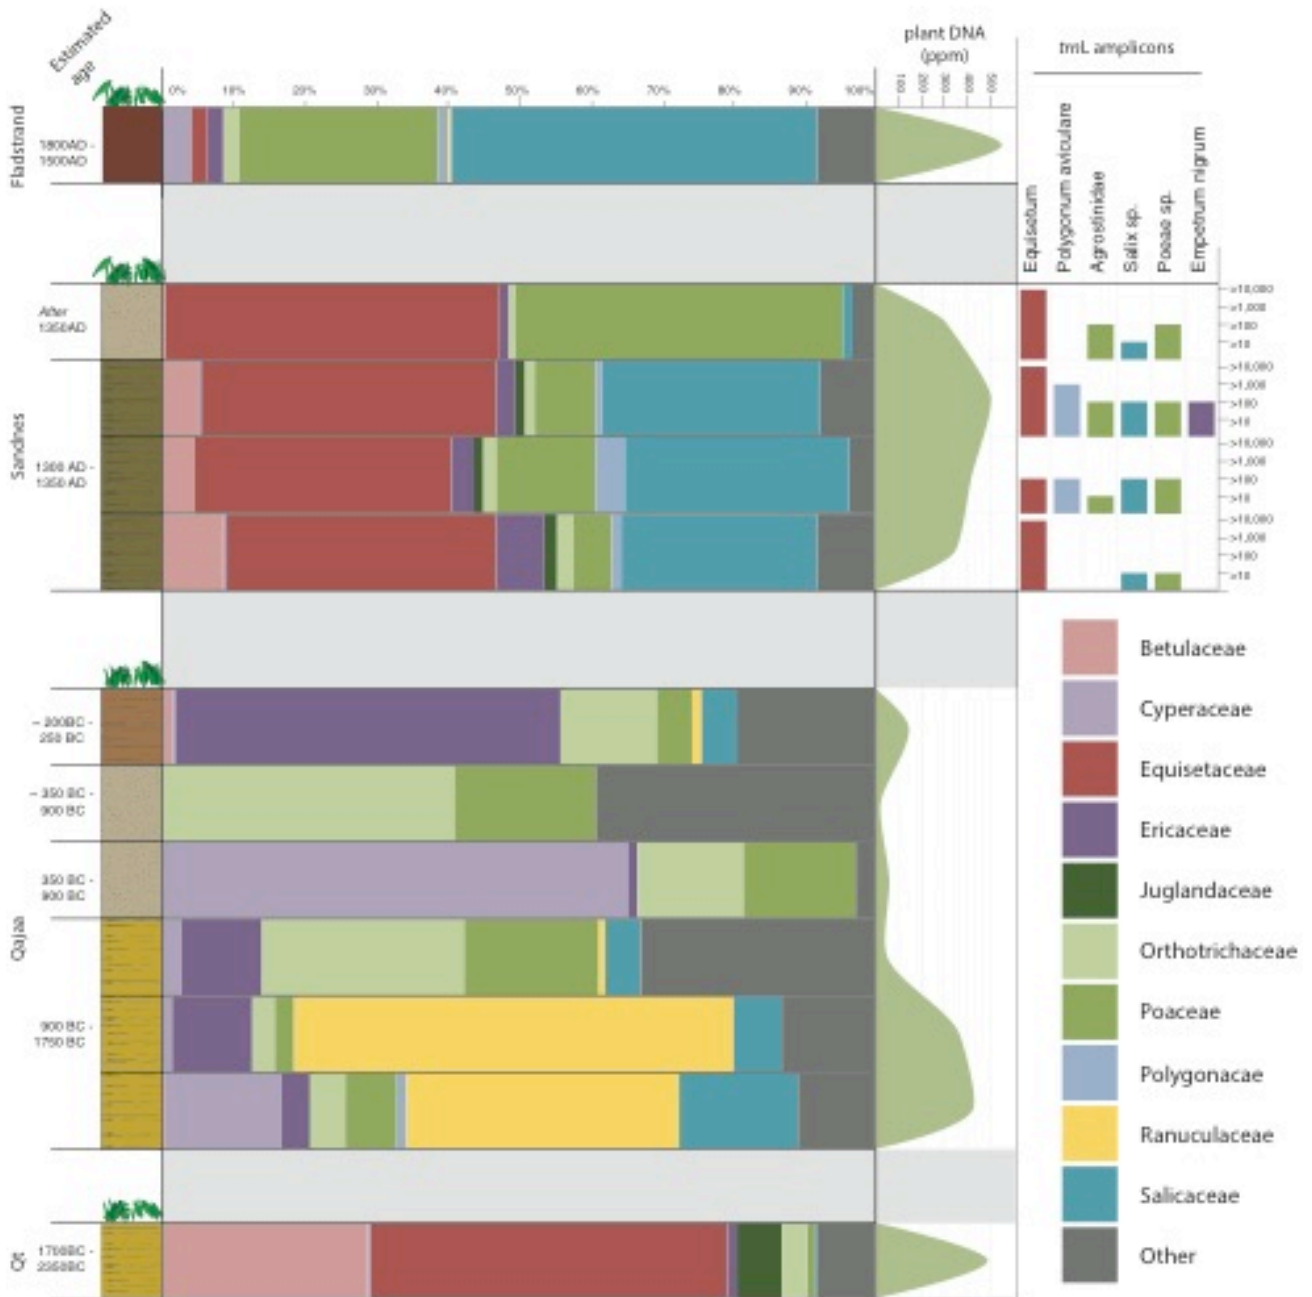

**Supplementary Figure 2 | Plant abundance.** Relative abundance of the 10 most common plant families, based on read counts in Supplementary Table 5. Plant DNA concentration is defined as plant DNA reads per million reads analyzed. *trnL* amplicons represents the 6 most abundant taxa identified. For each layer, only taxa identified in 2 or more replicates were included.

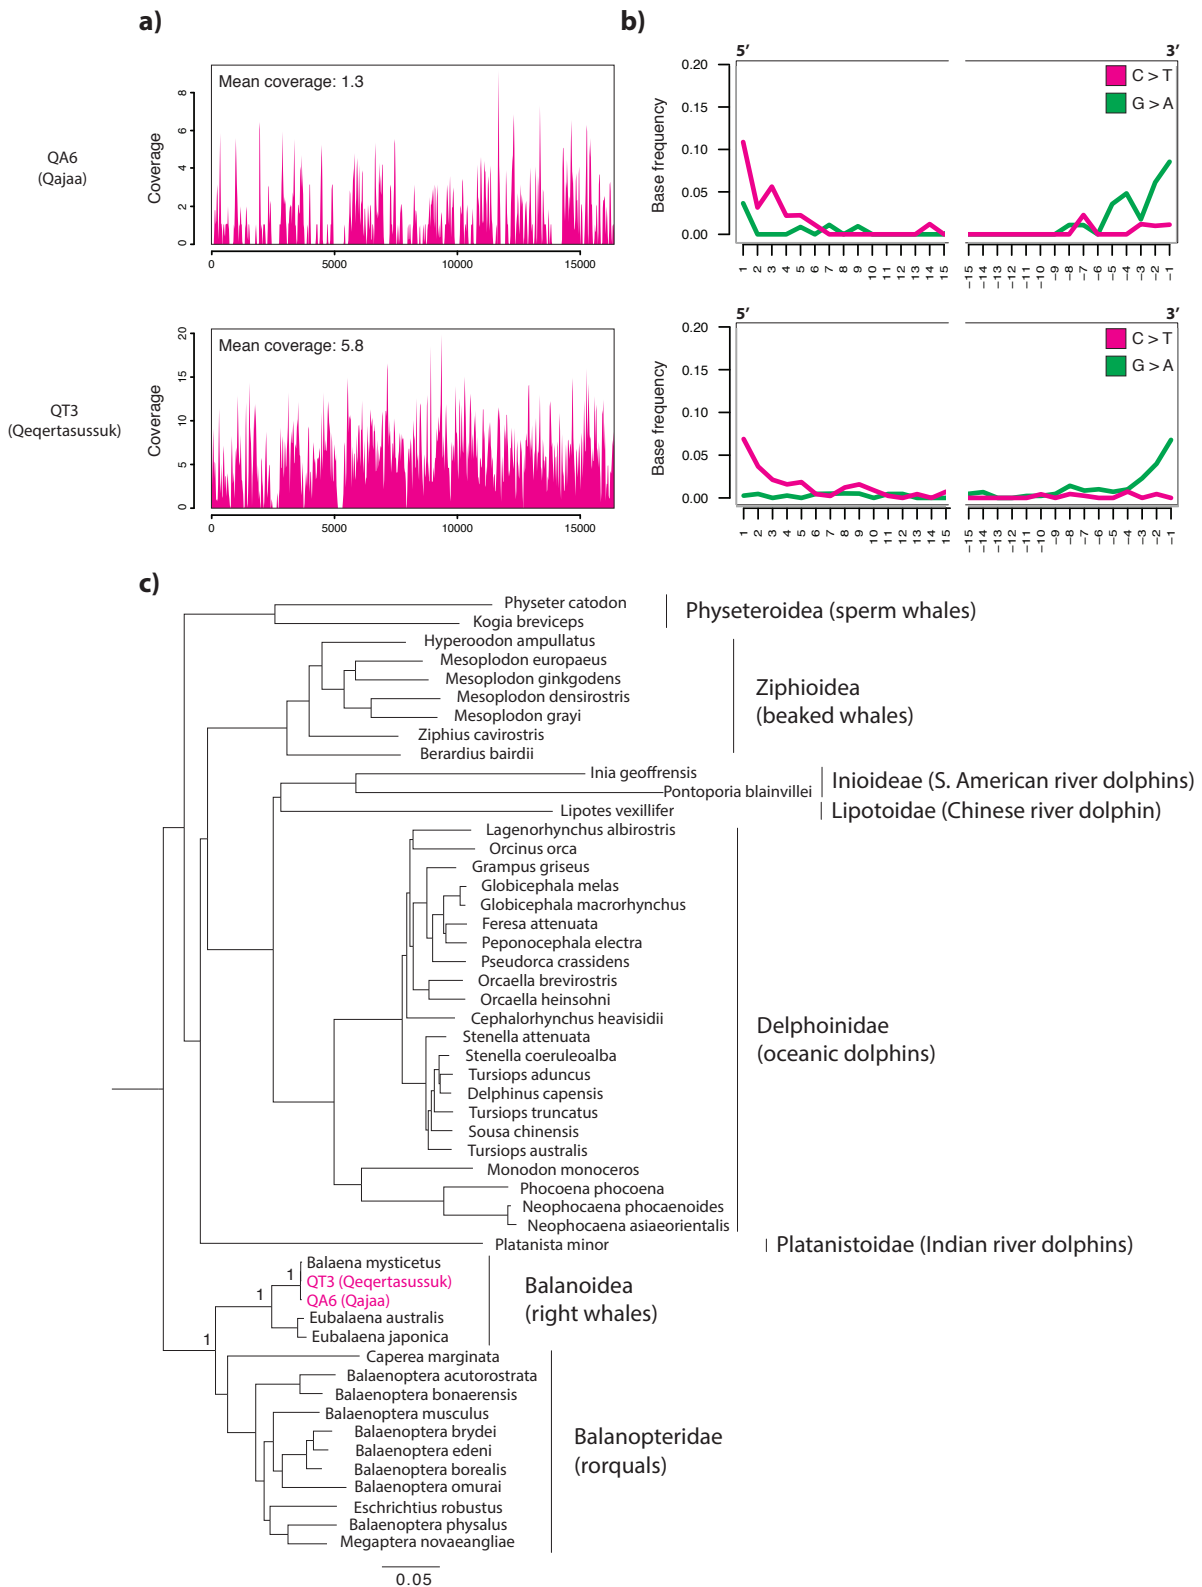

**Supplementary Figure 3 | Recovery of bowhead whale mitochondrial genomes from library QA6 at Qajaa and QT3 at Qeqertasussuk.** The mitochondrial genomes are based on reads assigned below family level, with the *Balaena mysticetus* reference genome among the best hits. **a)** Coverage plot of reads mapped to the bowhead whale reference mitochondrial genome (gi: 38707506). Green line presents the average depth of coverage. **b)** Nucleotide misincorporation pattern displaying the DNA damage pattern for the aligned reads. **c)** Bayesian tree illustrating the location of the recovered bowhead whale mitochondrial genomes (pink labels) in the phylogenetic tree of whales. The consensus tree was constructed, using hippopotamus (*Hippopotamus amphibius*, gi: 5836030) as an out-group (not shown). Relevant posterior probabilities are shown.

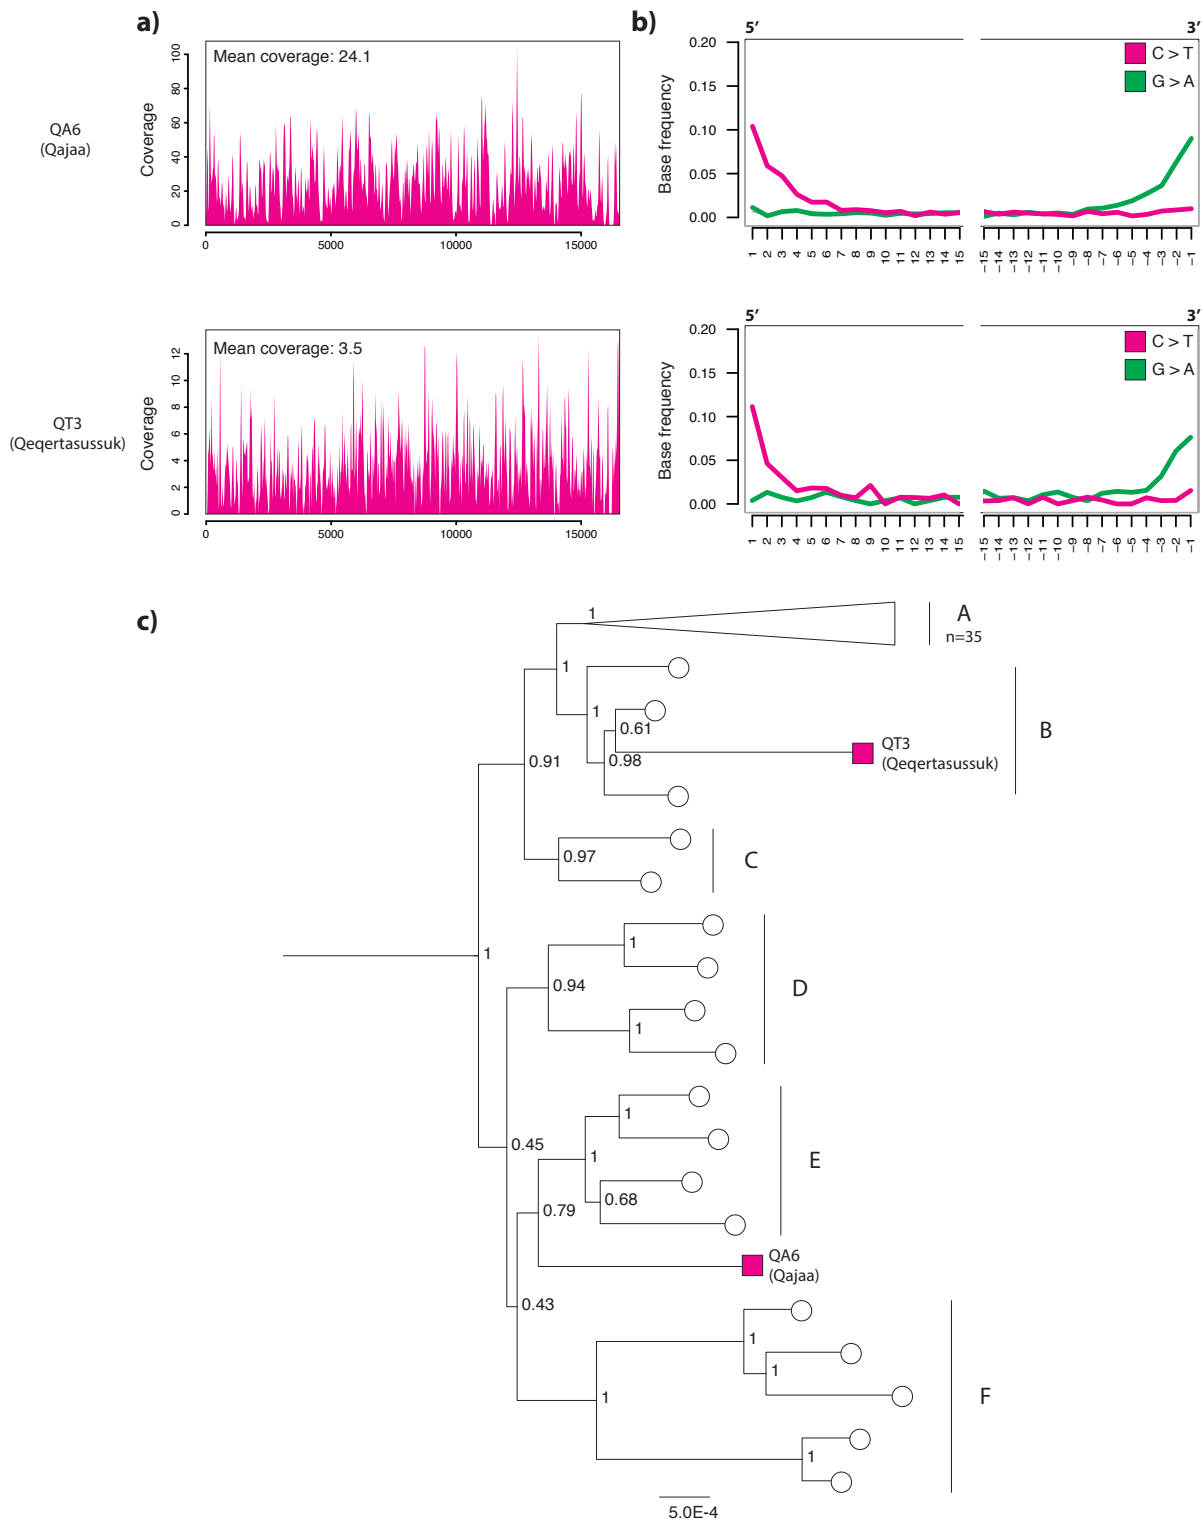

**Supplementary Figure 4 | Recovery of harp seal mitochondrial genomes from library QA6 at Qajaa and QT3 at Qeqertasussuk.** The mitochondrial genomes are based on reads assigned below family level, with the *Pagophilus groenlandicus* reference genome among the best hits. **a)** Coverage plot of reads mapped to the harp seal reference mitochondrial genome (gi:115494733). Green line presents the average depth of coverage. **b)** Nucleotide misincorporation pattern displaying the DNA damage pattern for the aligned reads. **c)** Bayesian tree illustrating the relationship between the recovered harp seal mitochondrial genomes (pink squares) and 6 harp seal haplogroups (A, B, C, D, E, F) from Carr et al. 2015 (open circles)<sup>23</sup>. The subtree representing haplo group A has been collapsed for clarity. The consensus tree was constructed, based on 54 harp seal mitochondrial genomes, using ribbon seal (*Phoca fasciata*, gi:115494719) as an out-group (not shown). Node labels represent posterior probabilities.

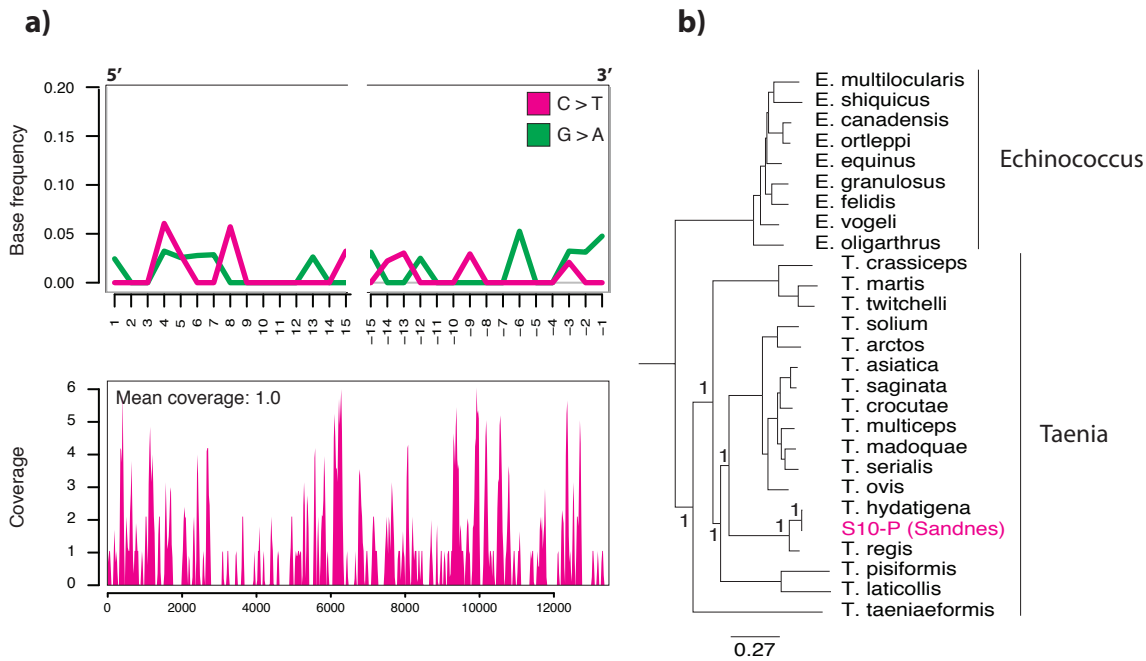

**Supplementary Figure 5 | Recovery of a *Taenia hydatigena* mitochondrial genomes from library S10-P at Sandnes.** The mitochondrial genome is based on reads assigned below family level, with the *Taenia hydatigena* (gi: 242613260) reference genome among the best hits. **a)** Nucleotide misincorporation pattern for the aligned reads. **b)** Coverage plot of reads mapped to the *Taenia hydatigena* reference mitochondrial genome. Green line represents the average depth of coverage **c)** Bayesian tree illustrating the location of the recovered mitochondrial genome (pink identifier) in the phylogenetic tree of tapeworms. The consensus tree was constructed, using *Hymenolepis diminuta* (gi:14018028) as an outgroup (not shown). Relevant posterior probabilities are shown.

| taxa                     | Flad-strand | Norse A | Norse B | Norse C | Norse D | Dorset | Peat B | Peat A | Late Saqqaq | Middle Saqqaq | Early Saqqaq | QT   |
|--------------------------|-------------|---------|---------|---------|---------|--------|--------|--------|-------------|---------------|--------------|------|
| Bovidae                  | -           | -       | 15      | 12      | 11      | -      | -      | -      | -           | -             | -            | 3*   |
| Bovinae                  | -           | -       | 16      | 12      | 12      | -      | -      | -      | -           | -             | -            | -    |
| Bos                      | 2*          | -       | 74      | 70      | 105     | 5*     | 3*     | 3*     | -           | -             | -            | 3*   |
| Caprinae                 | -           | -       | 12      | 5       | -       | -      | -      | -      | -           | -             | -            | -    |
| Capra                    | -           | -       | 36      | 13      | 17      | -      | -      | -      | -           | -             | -            | -    |
| Ovis                     | -           | -       | 23      | 9       | 15      | -      | -      | -      | -           | -             | -            | -    |
| Canis                    | 29          | -       | 2*      | 3*      | 4*      | 3      | -      | -      | -           | -             | -            | -    |
| Canis lupus              | 41          | -       | -       | 6*      | -       | 19     | -      | -      | -           | 6             | -            | -    |
| Canis lupus familiaris   | 21          | -       | -       | -       | -       | 7      | -      | -      | -           | 2             | -            | -    |
| Phocidae                 | -           | -       | -       | 7       | 13      | 46     | -      | -      | 21          | 1026          | 58           | 787  |
| Pagophilus groenlandicus | 4           | -       | 6       | 9       | 28      | 9      | -      | -      | 85          | 6357          | 303          | 1041 |
| Erignathus barbatus      | -           | -       | 2       | -       | -       | -      | -      | -      | 4           | 62            | 23           | 6    |
| Cystophora cristata      | -           | -       | -       | -       | -       | -      | -      | -      | 2           | -             | -            | 18   |
| Phoca                    | -           | -       | -       | 2       | 3       | -      | -      | -      | 9           | 361           | 17           | 98   |
| Phoca vitulina           | -           | -       | -       | -       | 8       | -      | -      | -      | -           | 6             | 6            | 35   |
| Pusa                     | -           | -       | -       | -       | -       | 14     | -      | -      | -           | -             | 3            | 82   |
| Pusa hispida             | 3           | -       | -       | -       | -       | 41     | -      | -      | -           | -             | 8            | 197  |
| Balaenidae               | -           | -       | -       | -       | -       | 2      | -      | -      | 9           | 53            | 24           | 360  |
| Balaena mysticetus       | -           | -       | -       | -       | -       | 5      | -      | -      | 32          | 339           | 107          | 1736 |
| Eubalaena                | -           | -       | -       | -       | -       | -      | -      | -      | -           | 2             | 4            | 23   |
| Monodon monoceros        | 7           | -       | -       | -       | -       | -      | -      | -      | 2           | 69            | -            | -    |
| Odobenus rosmarus        | -           | -       | 4       | 3       | 2       | -      | -      | -      | 2           | 89            | 35           | -    |
| Cervidae                 | -           | -       | -       | -       | -       | -      | -      | -      | -           | 55            | -            | 71   |
| Odocoileinae             | -           | -       | 2       | -       | -       | -      | -      | -      | -           | 30            | -            | 82   |
| Rangifer tarandus        | 2           | -       | -       | -       | 21      | -      | -      | -      | 4           | 567           | 7            | 657  |
| Lepus                    | 11          | -       | -       | -       | -       | -      | -      | -      | -           | -             | -            | -    |
| Phoca largha(?)          | -           | -       | -       | -       | -       | 2      | -      | -      | -           | 5             | -            | 10   |
| Pusa sibirica(?)         | -           | -       | -       | -       | -       | 4      | -      | -      | -           | -             | -            | 10   |
| Pusa caspica(?)          | -           | -       | -       | -       | -       | -      | -      | -      | -           | -             | -            | 20   |
| Phoca fasciata(?)        | -           | -       | -       | -       | -       | 2      | -      | -      | -           | 7             | -            | 8    |

**Supplementary Table 1 | Mammal read counts.** Read counts of mammal taxa represented by more than 10 reads in the dataset. Read counts below two are not shown. (?) Presumed false positives. \* Presumed contamination

| taxa                      | Fladstrand | Norse A | Norse B | Norse C | Norse D | Dorset | Peat B | Peat A | Late Saqqaq | Middle Saqqaq | Early Saqqaq | QT |
|---------------------------|------------|---------|---------|---------|---------|--------|--------|--------|-------------|---------------|--------------|----|
| Laridae                   | -          | -       | -       | -       | -       | 2      | -      | -      | -           | 17            | 19           | 5  |
| Larus                     | -          | -       | -       | -       | -       | -      | -      | -      | -           | 20            | 20           | 3  |
| Larus dominicanus (+)     | -          | -       | -       | -       | -       | -      | -      | -      | 2           | 39            | 43           | -  |
| Anatidae                  | 7          | -       | -       | -       | -       | -      | -      | -      | 2           | 12            | 10           | 4  |
| Branta                    | 9          | -       | -       | -       | -       | -      | -      | -      | -           | -             | 5            | -  |
| Branta canadensis         | 27         | -       | -       | -       | -       | -      | -      | -      | -           | 9             | 29           | -  |
| Gonorynchus greyi (+)     | 5          | -       | -       | -       | -       | -      | -      | 2      | -           | 10            | 3            | 4  |
| Pterothrissus gissu (+)   | 4          | -       | -       | -       | -       | -      | -      | -      | 2           | -             | 2            | 5  |
| Notropis stramineus (+)   | -          | -       | -       | -       | 2       | -      | -      | -      | 4           | 6             | -            | -  |
| Hypomesus nipponensis (+) | -          | -       | 2       | -       | 6       | -      | 2      | -      | 3           | 3             | 2            | 2  |
| Lates calcarifer (+)      | -          | -       | -       | -       | -       | -      | -      | -      | 3           | -             | 6            | 3  |
| Turdus merula (?)         | 13         | -       | 4       | 2       | 4       | 2      | 5      | -      | 9           | 2             | 5            | 28 |

**Supplementary Table 2 | Other vertebrate read counts** Read counts of non-mammal taxa represented by more than 10 reads in the dataset. Read counts below two are not shown. (?) Presumed false positives. (+) Presumed closest match assignment.

| taxa                     | Fladstrand | Norse A | Norse B | Norse C | Norse D | Dorset | Peat B | Peat A | Late Saqqaq | Middle Saqqaq | Early Saqqaq | QT |
|--------------------------|------------|---------|---------|---------|---------|--------|--------|--------|-------------|---------------|--------------|----|
| Taenia crocutae          | -          | -       | -       | -       | 3       | -      | -      | -      | -           | -             | -            | -  |
| Taenia multiceps         | 6          | -       | 2       | 3       | 17      | -      | -      | -      | -           | -             | -            | -  |
| Taenia                   | 6          | -       | 6       | 11      | 38      | -      | -      | -      | -           | -             | -            | -  |
| Taenia hydatigena        | -          | -       | 25      | 34      | 285     | -      | -      | -      | -           | -             | -            | -  |
| Taenia serialis          | -          | -       | -       | -       | 4       | -      | -      | -      | -           | -             | -            | -  |
| Echinococcus canadensis* | -          | -       | -       | -       | 8       | -      | -      | -      | -           | -             | -            | -  |
| Echinococcus             | -          | -       | -       | -       | 5       | -      | -      | -      | -           | -             | -            | -  |
| Echinococcus ortleppi    | -          | -       | -       | -       | 2       | -      | -      | -      | -           | -             | -            | -  |
| Taenia asiatica          | -          | -       | -       | -       | 2       | -      | -      | -      | -           | -             | -            | -  |
| Taenia regis             | -          | -       | -       | -       | 4       | -      | -      | -      | -           | -             | -            | -  |
| Taeniidae                | -          | -       | -       | -       | 2       | -      | -      | -      | -           | -             | -            | -  |
| Toxocara canis*          | -          | -       | -       | -       | -       | -      | -      | -      | -           | -             | 2            | -  |

**Supplementary Table 3 | Parasite read counts.** Parasite read counts within the families Taeniidae and Taxocaridae from each group. Read counts below two are not shown. \*Species with zoonotic properties.

| ID #                                   | 56                                                                                  | 57                                                                                  | 58                                                                                  | 60                                                                                  | 62                                                                                   | 204                                                                                   | 209                                                                                   |
|----------------------------------------|-------------------------------------------------------------------------------------|-------------------------------------------------------------------------------------|-------------------------------------------------------------------------------------|-------------------------------------------------------------------------------------|--------------------------------------------------------------------------------------|---------------------------------------------------------------------------------------|---------------------------------------------------------------------------------------|
| Site                                   | Sandnes                                                                             | Sandnes                                                                             | Sandnes                                                                             | Sandnes                                                                             | Sandnes                                                                              | Fladstrand                                                                            | Fladstrand                                                                            |
| Sample                                 | V51-4                                                                               | V51-5                                                                               | V51-6                                                                               | V51-8                                                                               | V51-10                                                                               | Cla6-100.0-203-2                                                                      | Cla6-100-201.0                                                                        |
| Processed for egg recovery (g)         | 26.8                                                                                | 35.7                                                                                | 40.9                                                                                | 32                                                                                  | 25.2                                                                                 | 14.3                                                                                  | 19.2                                                                                  |
| Eggs in processed sample               | 40                                                                                  | 90                                                                                  | 30                                                                                  | 10                                                                                  | 10                                                                                   | 10                                                                                    | 40                                                                                    |
| Tapeworm eggs isolated per gram sample | 1.5                                                                                 | 2.5                                                                                 | 0.7                                                                                 | 0.3                                                                                 | 0.4                                                                                  | 0.7                                                                                   | 2.1                                                                                   |
| Size of egg(s) (mm)                    | 31 x 27                                                                             | 33 x 30                                                                             | 35 x 31                                                                             | 33 x 31                                                                             | 35 x 30                                                                              | 33 x 30                                                                               | 33 x 29                                                                               |
| Egg(s) imaged                          | 4                                                                                   | 9                                                                                   | 3                                                                                   | 1                                                                                   | 1                                                                                    | 1                                                                                     | 4                                                                                     |
| Representative egg                     |  |  |  |  |  |  |  |

**Supplementary Table 4 | Morphological characterization of parasitic eggs.**

| taxa            | Flad-<br>strand | Norse<br>A | Norse<br>B | Norse<br>C | Norse<br>D | Dorset | Peat<br>B | Peat<br>A | Late<br>Saqqaq | Middle<br>Saqqaq | Early<br>Saqqaq | QT    |
|-----------------|-----------------|------------|------------|------------|------------|--------|-----------|-----------|----------------|------------------|-----------------|-------|
| Betulaceae      | -               | 86         | 1930       | 995        | 3219       | 257    | -         | -         | -              | 55               | 471             | 42334 |
| Cyperaceae      | 5515            | -          | 147        | -          | 83         | 111    | -         | 2312      | 194            | 1899             | 17698           | 102   |
| Equisetaceae    | 3432            | 15912      | 16749      | 8440       | 13940      | -      | -         | -         | -              | -                | -               | 73357 |
| Ericaceae       | 3221            | 375        | 1069       | 791        | 2514       | 10031  | -         | 56        | 797            | 16865            | 4510            | 1974  |
| Juglandaceae    | -               | -          | 445        | 229        | 648        | 54     | -         | -         | -              | -                | 114             | 8882  |
| Orthotrichaceae | 2931            | 377        | 698        | 416        | 879        | 2544   | 1346      | 518       | 2038           | 5062             | 5334            | 5524  |
| Poaceae         | 40193           | 15452      | 3300       | 3307       | 1946       | 868    | 651       | 557       | 1358           | 3935             | 7834            | 1102  |
| Polygonaceae    | 2109            | -          | 408        | 890        | 525        | 55     | -         | -         | -              | 186              | 1552            | -     |
| Ranunculaceae   | 153             | -          | -          | -          | -          | 226    | -         | -         | 67             | 92426            | 42045           | 175   |
| Salicaceae      | 73626           | 564        | 12390      | 7410       | 10157      | 878    | -         | -         | 364            | 10787            | 18184           | 501   |
| Other           | 11474           | 1039       | 3031       | 839        | 2980       | 3668   | 1294      | 103       | 2362           | 19479            | 11833           | 12099 |

**Supplementary Table 5 | Plant read counts.** Plant read counts from the ten most common plant families in each group. Counts below 50 are not shown.

| taxa                                                      |  | Flade-<br>strand | Norse<br>A | Norse<br>B | Norse<br>C | Norse<br>D | Dorset | Peat<br>B | Peat<br>A | Late<br>saqqaq | Middle<br>saqqaq | Early<br>saqqaq | QT   |
|-----------------------------------------------------------|--|------------------|------------|------------|------------|------------|--------|-----------|-----------|----------------|------------------|-----------------|------|
| Betulaceae: <i>Ostrya</i><br><i>rehderiana</i>            |  | -                | -          | 2          | 3          | 1.1        | -      | -         | -         | -              | -                | 6.5             | 4.2  |
| Cyperaceae: <i>Carex</i><br><i>siderosticta</i>           |  | 2.2              | -          | -          | -          | -          | -      | -         | 9.8       | -              | 6.9              | 8.8             | -    |
| Equisetaceae: <i>Equisetum</i><br><i>arvense</i>          |  | 0.3              | 1          | 0.5        | 0.9        | 0.6        | -      | -         | -         | -              | -                | -               | 1.2  |
| Ericaceae: <i>Vaccinium</i><br><i>macrocarpon</i>         |  | 1.1              | -          | 0.4        | 0.6        | 1.5        | 2.4    | -         | -         | 6.6            | 6.5              | 8.6             | 4.3  |
| Juglandaceae: <i>Juglans</i><br><i>regia</i>              |  | -                | -          | -          | -          | 0.6        | -      | -         | -         | -              | -                | -               | 3.7  |
| Orthotrichaceae: <i>Nyholmiella</i><br><i>obtusifolia</i> |  | 1.6              | -          | 1.4        | -          | 1.4        | 2.3    | 1.2       | 5         | 7.9            | 8.1              | 6.3             | 4.8  |
| Poaceae: <i>Poa palustris</i>                             |  | 0.9              | 0.9        | 1.9        | 1.9        | 1.8        | -      | -         | -         | 9.3            | 7.2              | 6.2             | -    |
| Polygonaceae: <i>Rheum</i><br><i>palmatum</i>             |  | 0.6              | -          | -          | 2.8        | -          | -      | -         | -         | -              | -                | 6.6             | -    |
| Ranunculaceae: <i>Ranunculus</i><br><i>macranthus</i>     |  | -                | -          | -          | -          | -          | -      | -         | -         | -              | 7.2              | 6.5             | -    |
| Salicaceae: <i>Salix suchowensis</i>                      |  | 1                | 0.9        | 1.5        | 1          | 1          | 1.5    | -         | -         | -              | 9.7              | 9.1             | -    |
| <i>Balaena mysticetus</i>                                 |  | -                | -          | -          | -          | -          | -      | -         | -         | -              | -                | -               | 7.1  |
| <i>Phoca groenlandica</i>                                 |  | -                | -          | -          | -          | -          | -      | -         | -         | -              | 10.7             | -               | 10.6 |
| <i>Rangifer tarandus</i>                                  |  | -                | -          | -          | -          | -          | -      | -         | -         | -              | 8.9              | -               | 13.1 |

**Supplementary Table 6 | DNA damage.** DNA damage on the first 5' position, from grouped samples. For each plant family, the most abundant species in each family was chosen as reference.

|                             | Age category | Live weight (kg) | MNI          | Biomass (kg)    | Abundance (%) |
|-----------------------------|--------------|------------------|--------------|-----------------|---------------|
| <b>Arctic fox</b>           |              | 3.00             | 903          | 2709            | 0.9           |
| <b>Ringed seal</b>          | 0-3 yrs      | 25.00            | 1764         | 44100           | 15.3          |
|                             | 3 - yrs      | 35.00            | 352          | 12320           | 4.3           |
| <b>Harp seal</b>            | 0-1 yrs      | 30.00            | 920          | 27600           | 9.5           |
|                             | 1-4 yrs      | 75.00            | 922          | 69150           | 23.9          |
|                             | 5- yrs       | 130.00           | 884          | 114920          | 39.7          |
| <b>Fulmar</b>               |              | 0.75             | 6630         | 4972.5          | 1.7           |
| <b>Ptarmigan</b>            |              | 0.50             | 1168         | 584             | 0.2           |
| <b>Gulls</b>                |              | 1.50             | 1914         | 2871            | 1             |
| <b>Little auk</b>           |              | 0.15             | 1634         | 245.1           | 0.1           |
| <b>Brunnich's guillemot</b> |              | 1.10             | 8769         | 9645.9          | 3.3           |
| <b>Total</b>                |              |                  | <b>25860</b> | <b>289117.5</b> | <b>100</b>    |

**Supplementary Table 7 | MNI estimates from Qeqertasussuk.** The table represents the estimates presented in column 3 (All faunal components) from table 9.5 in Meldgaard 2004.

| species               | NISP  | corr. NISP | sedaDNA |
|-----------------------|-------|------------|---------|
| Canis lupus           | 18    | 18         | 8       |
| Arctic hare           | 1     | 1          | 0       |
| Arctic fox            | 22    | 22         | 0       |
| Reindeer              | 10    | 10         | 663     |
| Harbour seal          | 1     | 30         | 12      |
| Ringed seal           | 119   | 3609       | 11      |
| Harp seal             | 339   | 10281      | 6745    |
| Bearded seal          | 1     | 30         | 89      |
| Narwhal               | 2     | 2          | 71      |
| Seagulls              | 775   | 856        | 178     |
| Other birds           | 263   | 290        | 71      |
| Unidentified bird sp. | 108   | -          | -       |
| Unidentified seal sp  | 13491 | -          | -       |

**Supplementary Table 8. Comparison of sedaDNA data with the bone record from Qajaa.** NISP and corrected NISP data are from<sup>13</sup>. In the corrected NISP counts, higher order taxa (birds sp. and seal sp.) are divided between the represented bird and seal species according to their relative abundances. sedaDNA data represents merged reads from the Saqqaq layers at Qajaa. In cases where higher order taxa could be uniquely identified to a single species, reads were collapsed to species level. Pearson's rho=0.93, p=3.2e-5.



| Library ID | Group         | pp reads  | Sample type   | CGG ID       | Sediment ID          |
|------------|---------------|-----------|---------------|--------------|----------------------|
| FA1        | Fladstrand    | 5668844   | sediment      | CGG-3-006350 | Cla6-100.0-203-3     |
| FA2-P      | Fladstrand    | 5718668   | parasite eggs | CGG-3-006349 | Cla6-100.0-203-2     |
| FA2        | Fladstrand    | 82275125  | sediment      | CGG-3-006349 | Cla6-100.0-203-1     |
| FA3        | Fladstrand    | 28605815  | sediment      | CGG-3-006348 | Cla6-100.0-203-1     |
| FB1-P      | Fladstrand    | 6920566   | parasite eggs | CGG-3-006351 | Cla6-104.25-209.25-1 |
| FB2        | Fladstrand    | 30681091  | sediment      | CGG-3-006352 | Cla6-104.25-209.25-2 |
| FB3-P      | Fladstrand    | 6975716   | parasite eggs | CGG-3-006353 | Cla6-104.25-209.25-3 |
| FB3        | Fladstrand    | 3563685   | sediment      | CGG-3-006353 | Cla6-104.25-209.25-3 |
| FC-P       | Fladstrand    | 15142728  | parasite eggs | CGG-3-006354 | Cla6-100-201.0       |
| FC         | Fladstrand    | 36232568  | sediment      | CGG-3-006354 | Cla6-100-201.0       |
| FD-P       | Fladstrand    | 18840140  | parasite eggs | CGG-3-006355 | Cla6-104.0-207.0     |
| FD         | Fladstrand    | 18042348  | sediment      | CGG-3-006355 | Cla6-104.0-207.0     |
| S1-P       | Norse A       | 8927177   | parasite eggs | -            | V51-1                |
| S1         | Norse A       | 34129091  | sediment      | -            | V51-1                |
| S2         | Norse A       | 31622972  | sediment      | -            | V51-2                |
| S3         | Norse A       | 37730534  | sediment      | -            | V51-3                |
| S4-P       | Norse B       | 11307868  | parasite eggs | -            | V51-4                |
| S4         | Norse B       | 35154452  | sediment      | -            | V51-4                |
| S5         | Norse B       | 24152070  | sediment      | -            | V51-5                |
| S5-P       | Norse B       | 8927051   | parasite eggs | -            | V51-5                |
| S6-P       | Norse C       | 9783576   | parasite eggs | -            | V51-6                |
| S6         | Norse C       | 14332072  | sediment      | -            | V51-6                |
| S7         | Norse C       | 31324404  | sediment      | -            | V51-7                |
| S8-P       | Norse D       | 10275581  | parasite eggs | -            | V51-8                |
| S8         | Norse D       | 34745133  | sediment      | -            | V51-8                |
| S9         | Norse D       | 21549472  | sediment      | -            | V51-9                |
| S10-P      | Norse D       | 18481341  | parasite eggs | -            | V51-10               |
| S10        | Norse D       | 22174720  | sediment      | -            | V51-10               |
| QB1-P      | Dorset        | 49724763  | parasite eggs | CGG-3-002130 | DC-1                 |
| QB1        | Dorset        | 28263734  | sediment      | CGG-3-002130 | DC-1                 |
| QB2-P      | Dorset        | 24790458  | parasite eggs | CGG-3-002134 | DC-5                 |
| QB2        | Dorset        | 27216862  | sediment      | CGG-3-002134 | DC-5                 |
| QB3-P      | Peat B        | 25059461  | parasite eggs | CGG-3-002136 | DC-7                 |
| QB3        | Peat B        | 33287966  | sediment      | CGG-3-002136 | DC-7                 |
| QB4-P      | Peat B        | 27305476  | parasite eggs | CGG-3-002137 | DC-8                 |
| QB4        | Peat B        | 28912824  | sediment      | CGG-3-002137 | DC-8                 |
| QB5        | Peat B        | 37008610  | sediment      | CGG-3-002140 | DC-11                |
| QA1-P      | Peat A        | 6071890   | parasite eggs | CGG-3-002116 | A1-28-8              |
| QA2-P      | Peat A        | 5599888   | parasite eggs | CGG-3-002117 | A1-28-9              |
| QA2        | Peat A        | 23252065  | sediment      | CGG-3-002117 | A1-28-9              |
| QA3        | Peat A        | 24496201  | sediment      | CGG-3-002116 | A1-28-10             |
| QA4-P      | Late Saqqaq   | 28726008  | parasite eggs | CGG-3-002120 | A1-28-12             |
| QA4        | Late Saqqaq   | 40545243  | sediment      | CGG-3-002120 | A1-28-12             |
| QA5-P      | Late Saqqaq   | 34138026  | parasite eggs | CGG-3-002121 | A1-28-13             |
| QA5        | Late Saqqaq   | 38776479  | sediment      | CGG-3-002121 | A1-28-13             |
| QA6-PI     | Middle Saqqaq | 21149076  | parasite eggs | CGG-3-002123 | A1-28-15             |
| QA6-PII    | Middle Saqqaq | 24908418  | parasite eggs | CGG-3-002123 | A1-28-15             |
| QA6        | Middle Saqqaq | 365686030 | sediment      | CGG-3-002123 | A1-28-15             |
| QA7-P      | Early Saqqaq  | 22336072  | parasite eggs | CGG-3-002125 | A1-28-17             |
| QA7        | Early Saqqaq  | 32655696  | sediment      | CGG-3-002125 | A1-28-17             |
| QA8-PI     | Early Saqqaq  | 63211742  | parasite eggs | CGG-3-002126 | A1-28-18             |
| QA8-PII    | Early Saqqaq  | 46273685  | parasite eggs | CGG-3-002126 | A1-28-18             |
| QA8        | Early Saqqaq  | 94865064  | sediment      | CGG-3-002126 | A1-28-18             |
| QT1-P      | Qt            | 12402646  | parasite eggs | CGG-3-001018 | Qt09-7-hul-top       |
| QT2-P      | Qt            | 9022699   | parasite eggs | CGG-3-001019 | Qt09-7-hul-bund      |
| QT3-P      | Qt            | 8749779   | parasite eggs | CGG-3-001020 | Qt09-8               |
| QT3        | Qt            | 222607436 | sediment      | CGG-3-001020 | Qt09-8               |
| QT4        | Qt            | 44527697  | sediment      | CGG-3-001020 | Qt09-8               |

**Supplementary Table 9 | Library preparation details.**

| AAR   | sample name | Sample type          | mass (mg) | cm below surface | 14C Age (BP) | Calibrated age                                                                                                                             |
|-------|-------------|----------------------|-----------|------------------|--------------|--------------------------------------------------------------------------------------------------------------------------------------------|
| 22808 | V51-3       | plant (E.nigrum)     | 2.5       | 15               | 668 +/- 25   | 68.2% probability<br>1283AD (38.9%) 1302AD<br>1367AD (29.3%) 1383AD<br>95.4% probability<br>1277AD (52.8%) 1316AD<br>1355AD (42.6%) 1390AD |
| 22809 | V51-5       | plant (unidentified) | 1.6       | 29               | 719 +/- 25   | 68.2% probability<br>1269AD (68.2%) 1287AD<br>95.4% probability<br>1256AD (93.5%) 1300AD<br>1370AD ( 1.9%) 1380AD                          |
| 22810 | V51-7       | plant (unidentified) | 4.2       | 44               | 556 +/- 30   | 68.2% probability<br>1324AD (29.7%) 1345AD<br>1393AD (38.5%) 1417AD<br>95.4% probability<br>1310AD (46.3%) 1361AD<br>1386AD (49.1%) 1430AD |
| 22811 | V51-10      | wood (unidentified)  | 25.9      | 64               | 701 +/- 28   | 68.2% probability<br>1271AD (68.2%) 1297AD<br>95.4% probability<br>1262AD (80.5%) 1306AD<br>1363AD (14.9%) 1385AD                          |
| 21594 | V51-10      | bone                 | 386       | 64               | 625 +/- 25   | 68.2% probability<br>1298AD (26.1%) 1320AD<br>1350AD (42.1%) 1391AD<br>95.4% probability<br>1290AD (95.4%) 1398AD                          |

**Supplementary Table 10 | <sup>14</sup>C Datings from samples at Sandnes.**

| Sample name            | Fladstrand/QT |      |        | Qajaa A/B |        | Qajaa profile A |        |        |       | Qajaa profile B |        |       | Sandnes |       |       |       |      |        |        |
|------------------------|---------------|------|--------|-----------|--------|-----------------|--------|--------|-------|-----------------|--------|-------|---------|-------|-------|-------|------|--------|--------|
|                        | F-EB          | F-LB | F-P-EB | Q-P-EB    | Q-P-LB | Q-PB            | QA-EB1 | QA-EB2 | QA-LB | QB-EB1          | QB-EB2 | QB-LB | S-EB1   | S-EB2 | S-EB3 | S-EB4 | S-LB | S-P-EB | S-P-LB |
| Bos                    | -             | -    | -      | 6         | 3      | -               | -      | -      | 2     | -               | -      | -     | -       | -     | -     | -     | -    | 9      | 5      |
| Canis lupus            | -             | -    | -      | -         | -      | -               | -      | -      | -     | -               | -      | -     | -       | -     | -     | -     | -    | 3      | -      |
| Homo                   | -             | -    | -      | -         | -      | -               | -      | -      | -     | -               | -      | -     | -       | -     | -     | -     | -    | 5      | -      |
| Homo sapiens           | -             | -    | -      | 2         | -      | -               | -      | -      | 2     | -               | -      | -     | -       | -     | 3     | -     | 3    | 11     | -      |
| Sus                    | -             | -    | -      | -         | -      | -               | 4      | -      | -     | -               | -      | -     | -       | -     | -     | -     | -    | 2      | -      |
| Sus scrofa             | -             | -    | -      | -         | -      | -               | 2      | -      | -     | -               | -      | -     | -       | -     | -     | -     | -    | 2      | -      |
| Sus scrofa taivanus    | -             | -    | -      | -         | -      | -               | -      | -      | -     | -               | -      | -     | -       | -     | -     | -     | -    | 2      | -      |
| Phasianidae            | -             | -    | -      | -         | -      | -               | -      | -      | -     | -               | -      | -     | -       | -     | -     | -     | -    | 3      | -      |
| Gallus                 | -             | -    | -      | -         | -      | -               | -      | -      | -     | -               | -      | -     | -       | -     | -     | -     | -    | 4      | -      |
| Gallus gallus          | -             | -    | -      | -         | -      | -               | -      | -      | -     | -               | -      | -     | -       | -     | -     | -     | -    | 4      | -      |
| Meleagris gallopavo    | -             | -    | -      | 2         | -      | -               | -      | -      | -     | -               | -      | -     | -       | -     | -     | -     | -    | 13     | -      |
| Gonorynchus greyi      | -             | -    | -      | -         | -      | -               | -      | -      | -     | 2               | -      | -     | -       | -     | -     | -     | -    | -      | -      |
| Leontopithecus rosalia | -             | -    | 6      | 14        | -      | -               | 34     | 8      | 29    | 14              | 3      | 10    | 5       | -     | -     | -     | -    | 102    | 2      |

**Supplementary Table 11 | Control libraries.** Vertebrate DNA reads from control samples. Samples denoted x-P-x represent parasite libraries. EB: Extraction blank, LB: Library blank, PB: Index PCR blank. Read counts below two are not shown.

| group         | pp. reads | vtbr. reads | vtbr. reads<br>/Mread | plant reads | plant reads<br>/Mread |
|---------------|-----------|-------------|-----------------------|-------------|-----------------------|
| Fladstrand    | 258667294 | 185         | 0.7                   | 142654      | 551.5                 |
| Norse A       | 112409774 | 0           | 0                     | 33805       | 300.7                 |
| Norse B       | 79541441  | 198         | 2.5                   | 40167       | 505                   |
| Norse C       | 55440052  | 153         | 2.8                   | 23317       | 420.6                 |
| Norse D       | 107226247 | 251         | 2.3                   | 36891       | 344                   |
| Dorset        | 129995817 | 161         | 1.2                   | 18692       | 143.8                 |
| Peat B        | 151574337 | 10          | 0.1                   | 3291        | 21.7                  |
| Peat A        | 59420044  | 5           | 0.1                   | 3546        | 59.7                  |
| Late Saqqaq   | 142185756 | 197         | 1.4                   | 7180        | 50.5                  |
| Middle Saqqaq | 411743524 | 9150        | 22.2                  | 150694      | 366                   |
| Early Saqqaq  | 259342259 | 746         | 2.9                   | 109575      | 422.5                 |
| QT            | 297310257 | 5310        | 17.9                  | 146050      | 491.2                 |

**Supplementary Table 12 | DNA details of grouped samples**

## Supplementary Note 1 - Methodical biases and contamination

To monitor lab contamination during extraction, library building and indexing, a collection of control reactions were included in each batch of sample preparation. From examination of these control samples we detect a low background contamination of DNA from human, cow and chicken (Supplementary table 11), all of which are well known lab contaminants<sup>11,12</sup>. Based on this, DNA from the order of *Primates* and *Phasianidae* was identified as contamination and discarded. While sheep and goat have been identified previously as common contaminants, we do not identify these species in either peat or control samples. The background contamination from cattle DNA represents 1-5 reads per group and is detected in peat layers without evidence of cultural remains as well as Inuit layers (marked with \* in Supplementary Table 1). At Sandnes, however, a strong and consistent signal from Cattle of ~30x the background contamination (82 – 117 reads per group) suggests additional endogenous DNA from the Norse cattle in these layers. As a result DNA from *Bos* was included in the dataset (Supplementary Table 2), while reads assumed to represent *Bos* contamination were omitted in Figure 2. Furthermore, in the extraction blank from the helminth library preparation of samples from Sandnes (S-P-EB) we detect 3 *Canis lupus* reads. While we identify *Canis lupus* reads in samples from both the helminth and the sediment library preparation batch, this could indicate that *Canis lupus* reads at Sandnes represent a contamination. Hence, *Canis* reads from Sandnes were marked as potential contamination and omitted in Figure 2. Reassuringly, no DNA from marine mammals were detected in any of the control reactions.

Apart from the background contamination, a low level of false positives is observed from close phylogenetic relatives to the expected species, such as the identification of *Phoca largha* and *Phoca fasciata* in libraries with high concentrations of harp seal DNA or the identification of *Pusa sibirica* and *Pusa caspica* in libraries with high concentrations of ringed seal DNA (Supplementary table 2). Such false positives are presumed to be an effect of DNA damage or sequencing errors causing a read to resemble a close relative to the true species. This hypothesis was tested by trimming all reads from each end with two trim sizes: 2bp and 5bp. Using these trimming settings we detect a reduction in reads assigned to the 4 expected false positives *Phoca largha*, *Pusa sibirica*, *Pusa caspica* and *Phoca fasciata* from 68 reads in total to 44 and 24 reads in total for 2bp and 5bp trimming from each end, respectively. This suggests that a large fraction of these assignments can be explained by 5' C to T misincorporations. However, with these trimming settings we lose valuable data, as a fraction of the assigned reads – 7.1% and 27.2% of all vertebrate reads for 2bp and 5bp, respectively – drops below the size threshold. Based on these results, we have decided to retain as much data as possible by not applying any trimming.

In addition to false positives from close phylogenetic relatives, we detect false positives presumed to be a result of closest match assignments where the true species of origin is absent from the database. This is illustrated by the identification of *Larus dominicanus* at Qajaa. Both *Larus hyperboreus* and *Larus glaucooides* have previously been identified at Qajaa<sup>13</sup>, however, these species are absent from the mitochondrial database. Accordingly, the identification of *Larus dominicanus* is assumed to represent a closest match assignment (Supplementary table 3). Lastly, we detect DNA from *Turdus merula* in almost all groups. These reads map exclusively to a 74bp region of the *Turdus merula* mitochondrial genome, which has high sequence similarity to bacterial DNA. Hence this identification most likely represents a false positive.

In the analysis of plant content in the sediments, we identify DNA from the family *Juglandaceae* which is not native to Greenland. Considering the low resolution in the taxonomic identification of plants and the co-occurrence of DNA from *Juglandaceae* and *Betluceae*, these reads could very well represent authentic DNA from the birch family.

Another potential bias comes from the higher coverage of GC-rich areas obtained from next generation sequencing data. To test whether this bias had any effect on the species identified here, we compared the GC content of each sequence in the mitochondrial database with the GC-content of the mitochondrial sequences from the species identified by the LCA algorithm. With a mean GC-content of 38.1% (SD: 8.5%) in the full mitochondrial database and 37.9% (SD: 8.1%) among the mitochondrial genomes from species identified here, we conclude that the GC bias of next-generation sequencing did not affect our results. Lastly, a bias could be introduced from DNA leaching between sediment layers. However, the absence of mammal DNA in the peat samples confirms that DNA leaching is not a problem in this experiment. Even though a substantial amount of vertebrate reads are identified in the Dorset layer at Qajaa, no signal from vertebrate species are detected in the peat layer below.

### **Supplementary Note 2 - Authenticity of results**

While a few studies have been published<sup>1-4</sup>, the use of shotgun sequencing to characterize compositions of higher eukaryotes remains largely untested, and thus results should be scrutinized to confirm data authenticity. Several lines of evidence point towards the validity of the data presented in this study. First, strict precautions were taken, both at the experimental and analytical stages of the study to ensure data authenticity. Sampling were carried out wearing gloves and facemask, and sample extraction and library building were carried out in dedicated ancient DNA facilities following strict aDNA guidelines<sup>56</sup>. At the analytical stages of the study, data authenticity is ensured by the use of a database containing all available mitochondrial genomes within *Metazoa*, as opposed to a small, curated database containing only species expected to be present in a given sample<sup>7</sup>. Furthermore, instead of maximizing the output by mapping to all sequencing data available<sup>1</sup>, we limit the database to contain only mitochondrial DNA, assuring that each species in the database is represented by similar quantities of DNA data. Lastly, we apply strict filtering to remove duplicate reads and DNA of low complexity or poor quality (see Methods). As a result, we are able to reliably identify the majority of mammal species present in the ancient refuse, even though no *a priori* assumptions of the expected findings were made (see Fig. 3). A second factor confirming the authenticity of the data is the presence of the unambiguous DNA damage patterns associated with ancient DNA, presented in Fig. 2 and Supplementary Figures 3-5. Illustrating the time dependent nature of DNA damage accumulation, these post-mortem modifications are more pronounced in the oldest Saqqaq layers, while they are entirely absent in the young deposits at Sandnes and Fladstrand<sup>8</sup>. Furthermore, read coverage across the entire mitochondrial genomes of harp seal, bowhead whale and *Taenia hydatigena*, demonstrated in Supplementary Figures 3-5, serves as an additional proof of data validity, since laboratory contamination from PCR fragments are expected to map exclusively to small regions of the reference<sup>9</sup>. Lastly, the congruency of plants identified with *trnL* metabarcoding, shotgun metagenomics and previous macrofossil and pollen analyses at Sandnes<sup>10</sup> provides compelling evidence for data authenticity (Supplementary Figure 2).

### **Supplementary Note 3 – Inferring biomass from DNA profiles**

The sedaDNA approach applied here provides an excellent means to investigate the taxonomic distribution across a variety of taxa based on a few grams of sediment. As

demonstrated in Figure 3, there is a good correlation between the DNA read counts and the expected biomass for harp seal, ringed seal, birds and fox at Qeqertasussuk. However, as discussed in the manuscript, the DNA distribution might not always reflect the biomass of the different species, as, e.g. defecation and urine might inflate the DNA record for domesticated species. Hence, when analysing sedaDNA results, the DNA sources should be carefully considered and, if available, the DNA data should be correlated with osteological evidence. In this study, the identification of hardened blubber oil within the sediment at Qeqertasussuk (Morten Meldgaard, personal communication) together with the absence of associated cetacean bones, suggests that the main source of bowhead whale DNA at Qeqertasussuk is blubber and meat. Alternative sources of DNA from marine mammals in this study could arise from the processing and usage of blubber. Blubber from seals or whales were used as fuel in lamps<sup>14</sup>; If such lamps were emptied onto the midden, the DNA signal from marine mammals could have been inflated. Similarly, the wastewater from boiling of skin and blubber in order to retrieve oil could have been discarded at the midden. However, the contribution of such alternative sources of DNA is unlikely to be significant as the blubber was heated, causing the DNA to be heavily damaged. In summary, based on the presented evidence, it cannot be conclusively shown that the biomass for bowhead whale can be inferred directly from the DNA read counts, as is the case for harp seal. However, it can safely be concluded that the level of bowhead whale exploitation at Qeqertasussuk and Qajaa, by far exceeds what has been estimated from the bone record previously.

## Supplementary Methods

**DNA Metabarcoding.** The *trnL* p6 loop of plant chloroplasts was amplified using the primers *trnL-g* (5'-GGGCAATCCTGAGCCAA) and *trnL-h* (5'-CCATTGAGTCTCTGCACCTATC) described in<sup>7</sup>, each tagged with a unique 6 nucleotide 5' identifier to distinguish sequences from different samples<sup>15</sup>. *trnL* sequences were generated from 16 extracts from Sandnes, every sample represented by at least one PCR reaction. For samples S2 -3, -4, -5, -6 and -7, *trnL* amplicons were generated in duplicates. To enhance the PCR reaction, DNA extracts were subjected to a secondary inhibitor removal step with the PowerClean® Pro Clean-Up Kit (MO-BIO). Depending on the DNA concentration, 1 to 5 µL purified extract was added to each 25µL reaction. PCR amplifications were carried out with 0.2µL Omni Klentaq DNA polymerase (DNA Polymerase Technology, Inc.) for 55 cycles in a reaction mixture with 2.5µL buffer, 12.5 µL PCR Enhancer Cocktail P (DNA Polymerase Technology, Inc.), 10mM dNTP and 1mM of each primer. The following PCR conditions were applied: 94°C for 4 min, 55 cycles of: 94°C for 30 seconds, 57°C for 30 seconds and 68°C for 60 seconds, followed by a final elongation phase at 68°C for 7 minutes. After purification with MinElute columns, PCR products were visualized on an agarose gel (2%) and a 2200 TapeStation (Agilent) using the D1000 screen tape assay. Lastly, PCR products were pooled in equimolar amounts, based on DNA concentrations measured on a Qubit fluorometer (Life Technologies) and prepared for sequencing using the NEBNext DNA Library Prep Master Mix for 454 (E6070) as described in Methods.

**Sequence Analysis of Plant Barcodes.** Data from *trnL* amplicons were demultiplexed and trimmed with Novobarcode and AdapterRemoval as described in Methods, only retaining collapsed reads. Followingly, amplicon reads were assigned to their corresponding samples based on primer tags using the ngsfilter program from the OBITOOLS package (<http://www.grenoble.prabi.fr/trac/OBITools>). Only sequences with two tags showing a complete match and primers with maximum 2 mismatches were considered. Next, reads were dereplicated with obiuniq and denoised with obigrep, discarding sequences shorter than 10bp or

represented by fewer than 2 reads. The obiclean program<sup>16</sup> was then applied to cluster variants of the same sequence as a result of amplification or sequencing errors, linking two sequences if the count of the rare sequence was less than 5% of the count of the abundant sequence. Subsequently, the ecoTag<sup>17</sup> program was applied to assign taxa to each amplicon, using a custom made database of *trnL* sequences from plant species of Greenland described in Bocher<sup>18</sup>. Finally, taxa represented by less than five reads or assigned at a taxonomic resolution above family level were discarded.

**Phylogenetic analyses and NMDS plots.** Consensus sequences were called using ANGSD<sup>19</sup> (0.911) and phylogenetic trees were constructed with MrBayes (3.2.6)<sup>20</sup>, based on best substitution models identified by jModelTest (2.1.7)<sup>21</sup>: GTR+I+G for whale and helminth phylogeny and GTR+G for harp seal phylogeny. For each tree, four runs of four MCMC chains were run for 5,000,000 iterations sampling every 1,000 generations. Majority rule consensus trees were constructed using a burnin of 25% (sumt Contype = Allcompat relburnin =yes burninfrac = 0.25) and visualized with FigTree (1.4.2) (<http://beast.bio.ed.ac.uk/figtree>).

Variations within vertebrate and plant taxa were visualized with non-metric multidimensional scaling (NMDS) plots based on hellinger transformed bray-curtis distance calculations, using the R packages vegan (<https://cran.r-project.org/web/packages/vegan/index.html>) and MASS (<https://cran.r-project.org/web/packages/MASS/index.html>). NMDS plots were based on reads assigned within *Vertebrata* and *Viridiplantae*, respectively. For vertebrates, plots were generated from read counts of the 42 vertebrate taxa identified in Supplementary Table 2 and 3. Samples from peat layers were excluded, since no vertebrates reads were identified in these libraries. For plants, the plotting is based on plant families represented by more than 50 reads across the data set.

## Supplementary References

1. Smith, O. *et al.* Sedimentary DNA from a submerged site reveals wheat in the British Isles 8000 years ago. **2**, (2014).
2. Srivathsan, A., Sha, J. C. M., Vogler, A. P. & Meier, R. Comparing the effectiveness of metagenomics and metabarcoding for diet analysis of a leaf-feeding monkey (*Pygathrix nemaeus*). *Mol. Ecol. Resour.* 250–261 (2014). doi:10.1111/1755-0998.12302
3. Bon, C. *et al.* Coprolites as a source of information on the genome and diet of the cave hyena. *Proc. R. Soc. B Biol. Sci.* **279**, 2825–2830 (2012).
4. Paula, D. P. *et al.* Detection and decay rates of prey and prey symbionts in the gut of a predator through metagenomics. *Mol. Ecol. Resour.* 880–892 (2015). doi:10.1111/1755-0998.12364
5. Willerslev, E. & Cooper, A. Ancient DNA. *Proc. Biol. Sci.* **272**, 3–16 (2005).
6. Gilbert, M. T. P., Bandelt, H. J., Hofreiter, M. & Barnes, I. Assessing ancient DNA studies. *Trends Ecol. Evol.* **20**, 541–544 (2005).
7. Taberlet, P. *et al.* Power and limitations of the chloroplast *trnL* (UAA) intron for plant DNA barcoding. *Nucleic Acids Res.* **35**, (2007).
8. Sawyer, S., Krause, J., Guschanski, K., Savolainen, V. & Pääbo, S. Temporal patterns of nucleotide misincorporations and DNA fragmentation in ancient DNA. *PLoS One* **7**, (2012).
9. Kjartansdóttir, K. R. *et al.* Traces of ATCV-1 associated with laboratory component contamination. *Proc. Natl. Acad. Sci.* **112**, E925–E926 (2015).

10. Fredskild, B. & Humle, L. Plant remains from the Norse farm Sandnes in the Western Settlement, Greenland. *Acta Boreal.* **1**, 69–81 (1991).
11. Leonard, J. A. *et al.* Animal DNA in PCR reagents plagues ancient DNA research. *J. Archaeol. Sci.* **34**, 1361–1366 (2007).
12. Haile, J. *et al.* Ancient DNA reveals late survival of mammoth and horse in interior Alaska. *Proc. Natl. Acad. Sci. U. S. A.* **106**, 22352–22357 (2009).
13. Mohl, J. Dog Remains from a Paleoeskimo Settlement in West Greenland. *Arctic Anthropol.* **23**, 81–89 (1986).
14. Grønnow, B., Appelt, M. & Odgaard, U. in *Northern Worlds - landscapes, interactions and dynamics* 403–422 (2014).
15. Binladen, J. *et al.* The use of coded PCR primers enables high-throughput sequencing of multiple homolog amplification products by 454 parallel sequencing. *PLoS One* **2**, 1–9 (2007).
16. Bellemain, E. *et al.* Fungal palaeodiversity revealed using high-throughput metabarcoding of ancient DNA from arctic permafrost. *Environ. Microbiol.* **15**, 1176–1189 (2013).
17. Yoccoz, N. G. *et al.* DNA from soil mirrors plant taxonomic and growth form diversity. *Mol. Ecol.* **21**, 3647–3655 (2012).
18. Bocher, T. W., Fredskild, B., Holmen, K. & Jakobsen, K. *Grønlands Flora*. (P. Haase & Søn's Forlag, 1978).
19. Korneliussen, T. S., Albrechtsen, A. & Nielsen, R. ANGSD: Analysis of Next Generation Sequencing Data. *BMC Bioinformatics* **15**, 356 (2014).
20. Ronquist, F. & Huelsenbeck, J. P. MrBayes 3: Bayesian phylogenetic inference under mixed models. *Bioinformatics* **19**, 1572–1574 (2003).
21. Darriba, D., Taboada, G. L., Doallo, R. & Posada, D. jModelTest 2: more models, new heuristics and parallel computing. *Nat. Methods* **9**, 772–772 (2012).
22. Meldgaard, M. Ancient Harp Seal Hunters of Disko Bay. *Meddelelser om Grønland. Man Soc.* (2004).
23. Carr, S. M., Duggan, A. T., Stenson, G. B. & Marshall, H. D. Quantitative Phylogenomics of Within-Species Mitogenome Variation: Monte Carlo and Non-Parametric Analysis of Phylogeographic Structure among Discrete Transatlantic Breeding Areas of Harp Seals (*Pagophilus groenlandicus*). *PLoS One* **10**, e0134207 (2015).
